# Supplementary material
Source: MDPI journal article supplement (https://www.mdpi.com/2504-2289/7/1/46)
Supplement: s1 [file s1]

Archive with 2 entries (2 files):
- Table S1-S6.pdf
- Table S7-S11.pdf
